# Supplementary material for: Sox12 promotes T reg differentiation in the periphery during colitis
Source: PubMed Central journal article supplement — J Exp Med. 2018 Oct 1;215(10):2509–19. doi: 10.1084/jem.20172082 (PMC6170178; doi:10.1084/jem.20172082), 2018-10-01
Supplement: JEM_20172082_sm.pdf [file JEM_20172082_sm.pdf]

Supplemental material

Tanaka et al., <https://doi.org/10.1084/jem.20172082>

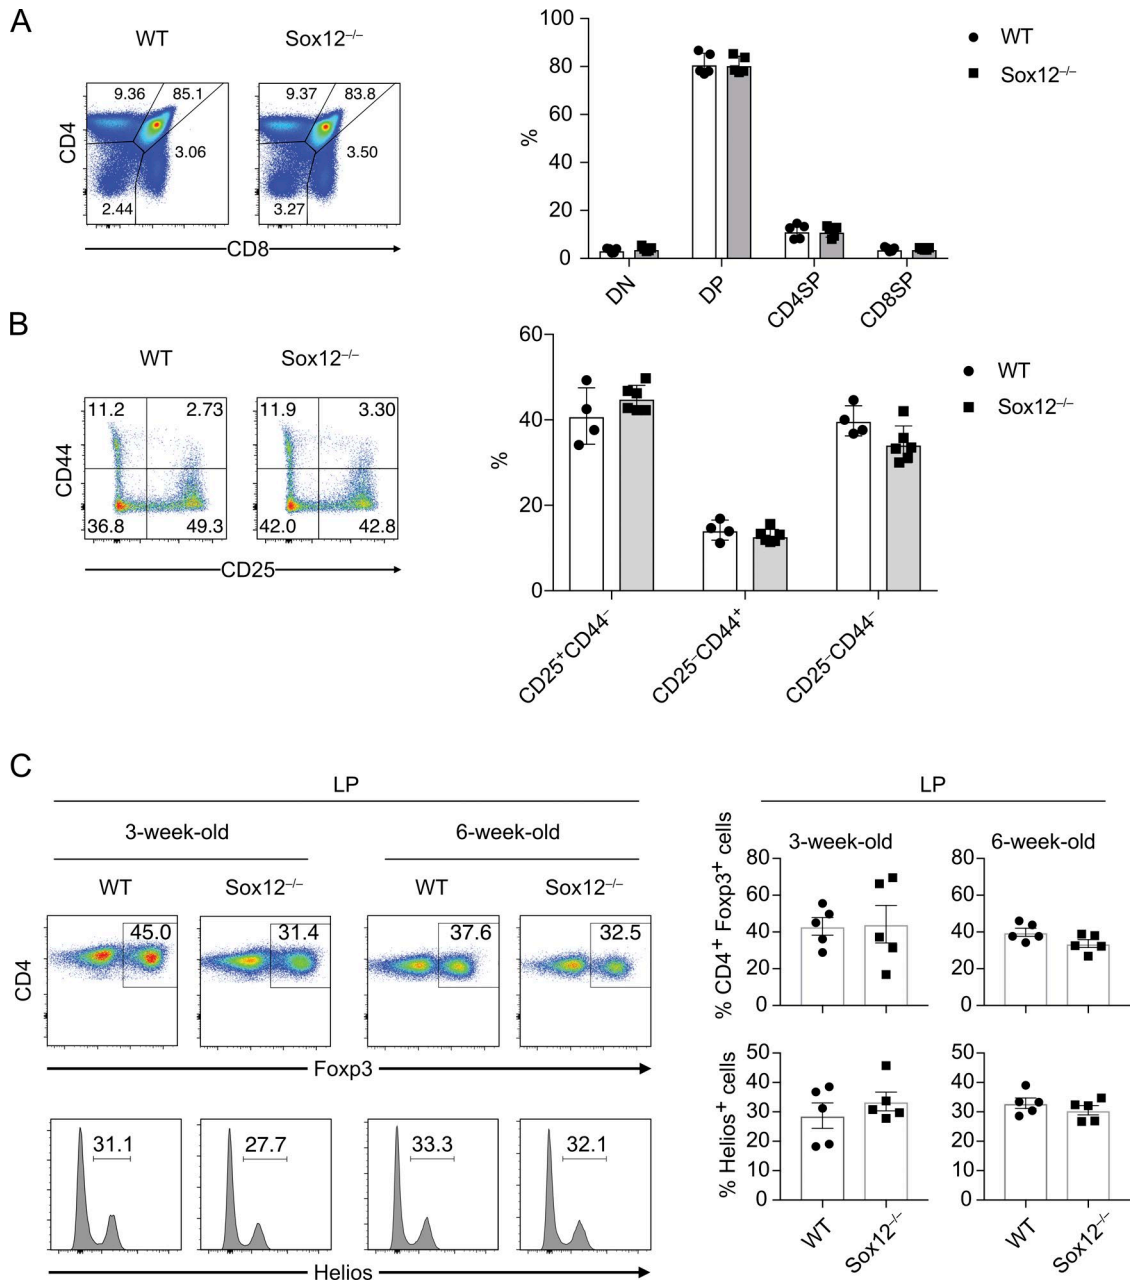

Figure S1. **Development of thymocytes and colonic T reg cells in Sox12<sup>-/-</sup> mice.** (A) Thymocytes from 6–8-wk-old WT mice and Sox12<sup>-/-</sup> mice were analyzed by flow cytometry. Representative FACS profiles of CD8 versus CD4 of thymocytes and means ± SEM of percentages of double negative (DN) cells, double positive (DP) cells, CD4 single positive (CD4SP) cells, and CD8 single positive (CD8SP) cells are shown. (B) Representative FACS profiles of CD44 versus CD25 of DN cells and means ± SEM of percentages of CD25<sup>+</sup>CD44<sup>-</sup> cells, CD25<sup>-</sup>CD44<sup>+</sup> cells, and CD25<sup>+</sup>CD44<sup>+</sup> cells are shown (n = 5 from two independent experiments). (C) Lamina propria (LP) of large intestine in WT mice and Sox12<sup>-/-</sup> mice were analyzed at the age of 3 wk and 6 wk. Representative FACS profiles of Fopx3 versus CD4 of CD3<sup>+</sup>CD4<sup>+</sup>T cells and histograms of Helios of Fopx3<sup>+</sup>CD3<sup>+</sup>CD4<sup>+</sup>T cells and means ± SEM of percentages of Fopx3<sup>+</sup> cells in CD3<sup>+</sup>CD4<sup>+</sup>T cells and of Helios<sup>+</sup> cells in Fopx3<sup>+</sup>CD3<sup>+</sup>CD4<sup>+</sup>T cells are shown (n = 5 from two independent experiments).

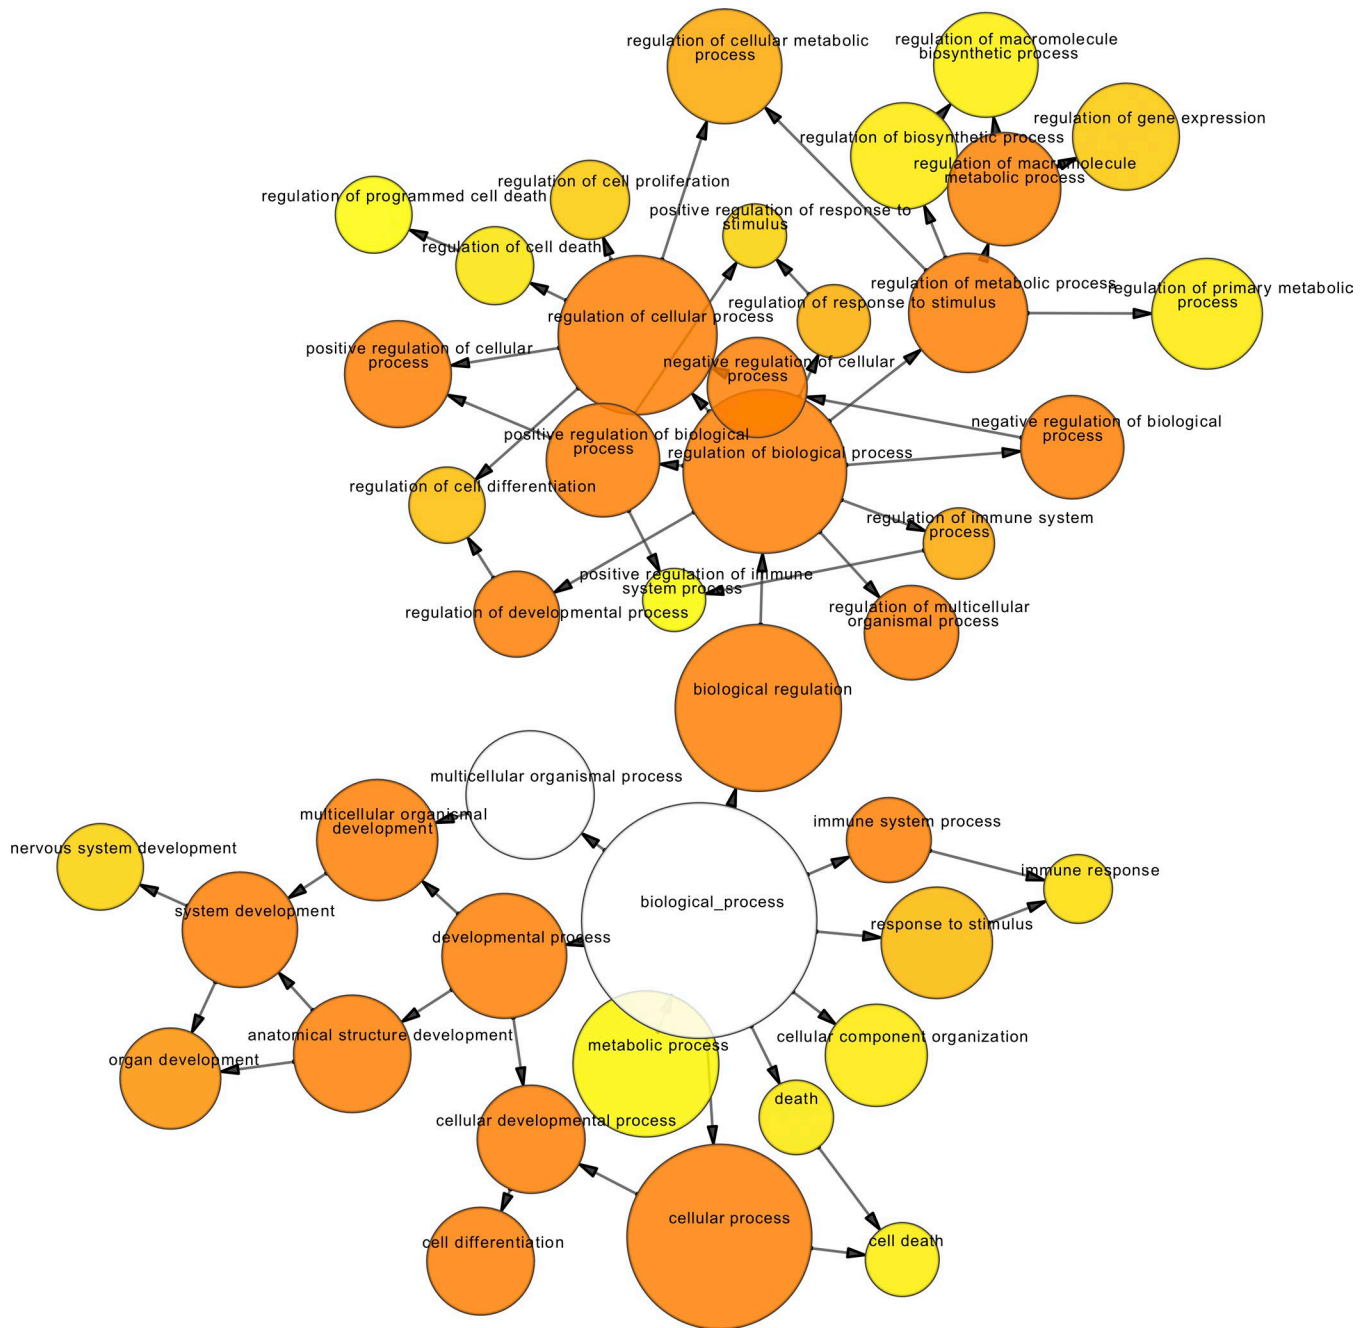

Figure S2. **GO terms of transcripts altered by the expression of Sox12 Transcriptome analyses of CD4<sup>+</sup> T cells infected with pMX-IN retrovirus and those infected with pMX-IN Sox12 retrovirus were performed.** Cytoscape and BiNGO plugin were used to analyze which GO terms are overrepresented in differentially expressed genes.

**Table S1 is included as a separate Word file and shows differentially expressed genes between CD4<sup>+</sup> T cells infected with Sox12 retrovirus and those with mock retrovirus.**
